# Supplementary material for: Wolbachia Enhances West Nile Virus (WNV) Infection in the Mosquito Culex tarsalis
Source: PubMed Central journal article supplement (PMC4091933; doi:10.1371/journal.pntd.0002965), 2014-07-10

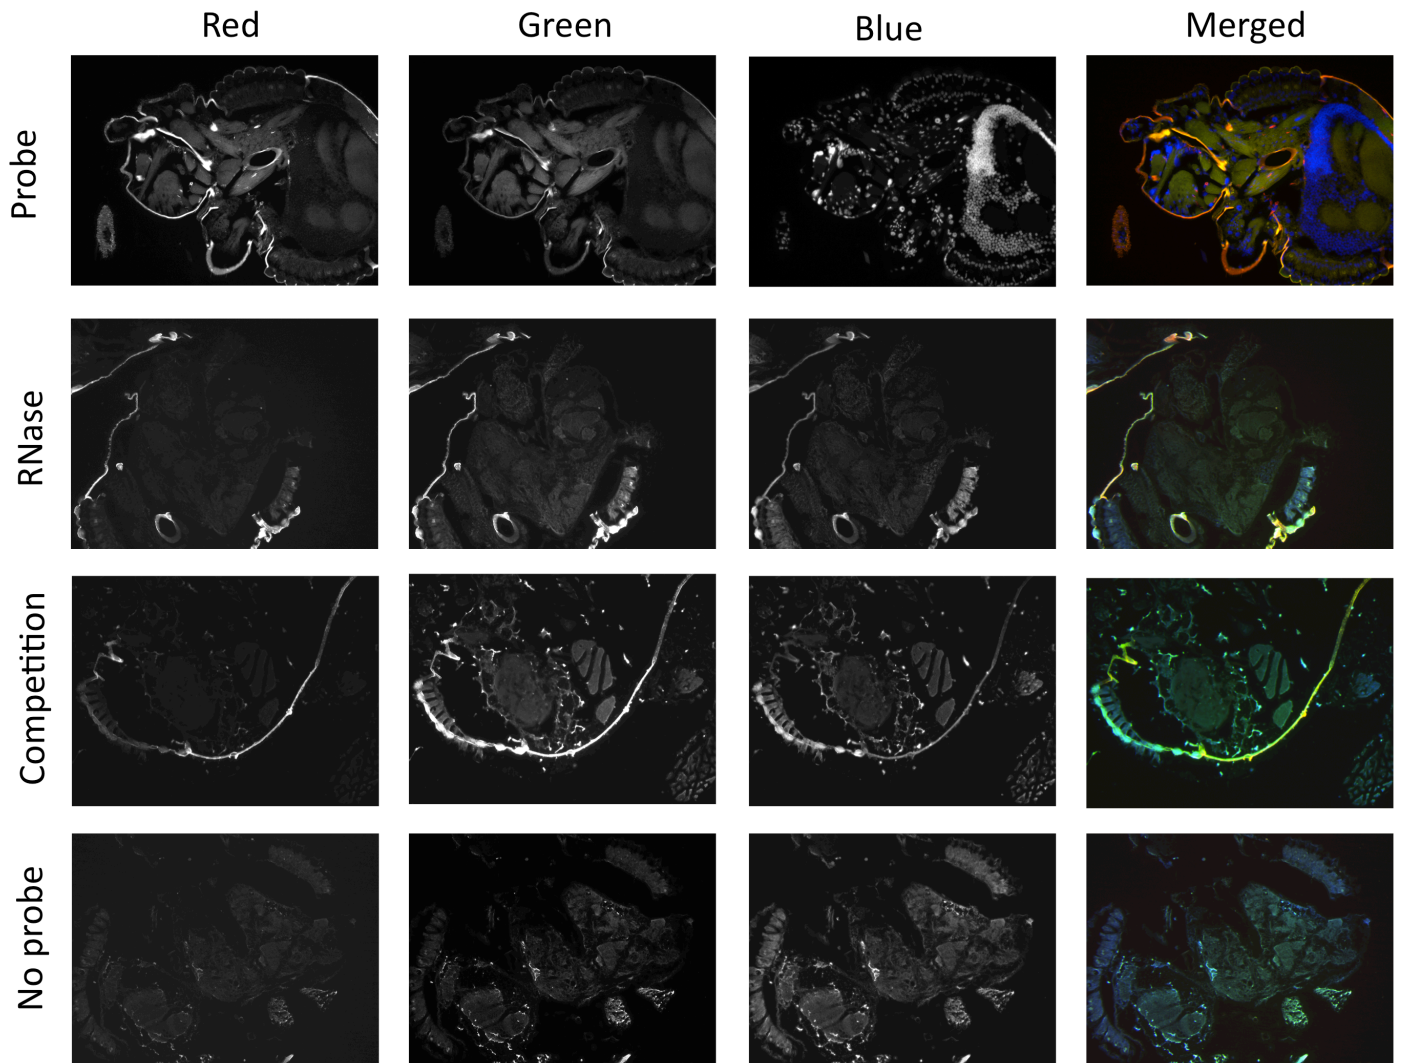

Supplement: pntd.0002965.s001.pdf [file pntd.0002965.s001.pdf]
