# Supplementary material for: Wolbachia Enhances West Nile Virus (WNV) Infection in the Mosquito Culex tarsalis
Source: PubMed Central journal article supplement (PMC4091933; doi:10.1371/journal.pntd.0002965), 2014-07-10
Supplement: pntd.0002965.s002.pdf [file pntd.0002965.s002.pdf]

**Supporting Table 1. Vector competence of *Culex tarsalis* following a WNV infectious blood meal. Parentheses denote sample sizes.**

| Treatment                   | Day post feeding | Rep 1        | Rep 2        |
|-----------------------------|------------------|--------------|--------------|
| <b><u>Infected</u></b>      |                  |              |              |
| <i>Wolbachia</i>            | 7                | 73 (30)      | 73 (30)      |
| Control                     |                  | 43 (30)      | 36 (25)      |
| <i>p value</i> <sup>b</sup> |                  | <b>0.035</b> | <b>0.007</b> |
| <i>Wolbachia</i>            | 14               | 50 (30)      | 86 (7)       |
| Control                     |                  | 47 (30)      | 20 (5)       |
| <i>p value</i> <sup>b</sup> |                  | 1.0          | 0.072        |
| <b><u>Disseminated</u></b>  |                  |              |              |
| <i>Wolbachia</i>            | 7                | 55           | 40           |
| Control                     |                  | 38           | 56           |
| <i>p value</i> <sup>b</sup> |                  | 0.49         | 0.69         |
| <i>Wolbachia</i>            | 14               | 93           | 83           |
| Control                     |                  | 86           | 100          |
| <i>p value</i> <sup>b</sup> |                  | 0.598        | 1.0          |
| <b><u>Transmitted</u></b>   |                  |              |              |
| <i>Wolbachia</i>            | 7                | 5            | 0            |
| Control                     |                  | 0            | 11           |
| <i>p value</i> <sup>b</sup> |                  | 1.0          | 0.29         |
| <i>Wolbachia</i>            | 14               | 60           | 67           |
| Control                     |                  | 36           | 100          |
| <i>p value</i> <sup>b</sup> |                  | 0.27         | 1.0          |

<sup>a</sup> Calculated based on number of infected mosquitoes

<sup>b</sup> Fisher's exact test

Italicized and bold values denote statistical significance.
